# Supplementary material
Source: PubMed Central journal article supplement (PMC8255636)
Supplement: ofa-0014-0283-s01.pdf [file ofa-0014-0283-s01.pdf]

## **Supplementary material**

### **Birthweight, childhood body mass index, height and growth and risk of polycystic ovary syndrome**

Julie Aarestrup, PhD<sup>a</sup>, Dorthe C. Pedersen, MSc<sup>a</sup>, Peter E. Thomas, MD<sup>a</sup>, Dorte Glintborg, MD, PhD<sup>b</sup>, Jens-Christian Holm, MD, PhD<sup>c-d</sup>, Lise G. Bjerregaard, PhD,<sup>a</sup> Jennifer L. Baker, PhD<sup>a,d</sup>

<sup>a</sup> Center for Clinical Research and Prevention, Bispebjerg and Frederiksberg Hospital, The Capital Region, Frederiksberg, Denmark

<sup>b</sup> Department of Endocrinology and Metabolism, Odense University Hospital, University of Southern Denmark, Odense C, Denmark

<sup>c</sup> The Children's Obesity Clinic, European Center of Management (EASO), Department of Pediatrics, Holbæk University Hospital, Holbæk, Denmark

<sup>d</sup> Novo Nordisk Foundation Center for Basic Metabolic Research, Human Genomics and Metagenomics in Metabolism, Faculty of Health and Medical Sciences, University of Copenhagen, Copenhagen, Denmark

**Supplementary Fig. S1.** Flow chart of eligible and included individuals in the study. BMI, body mass index; CSHRR, Copenhagen School Health Records Register.

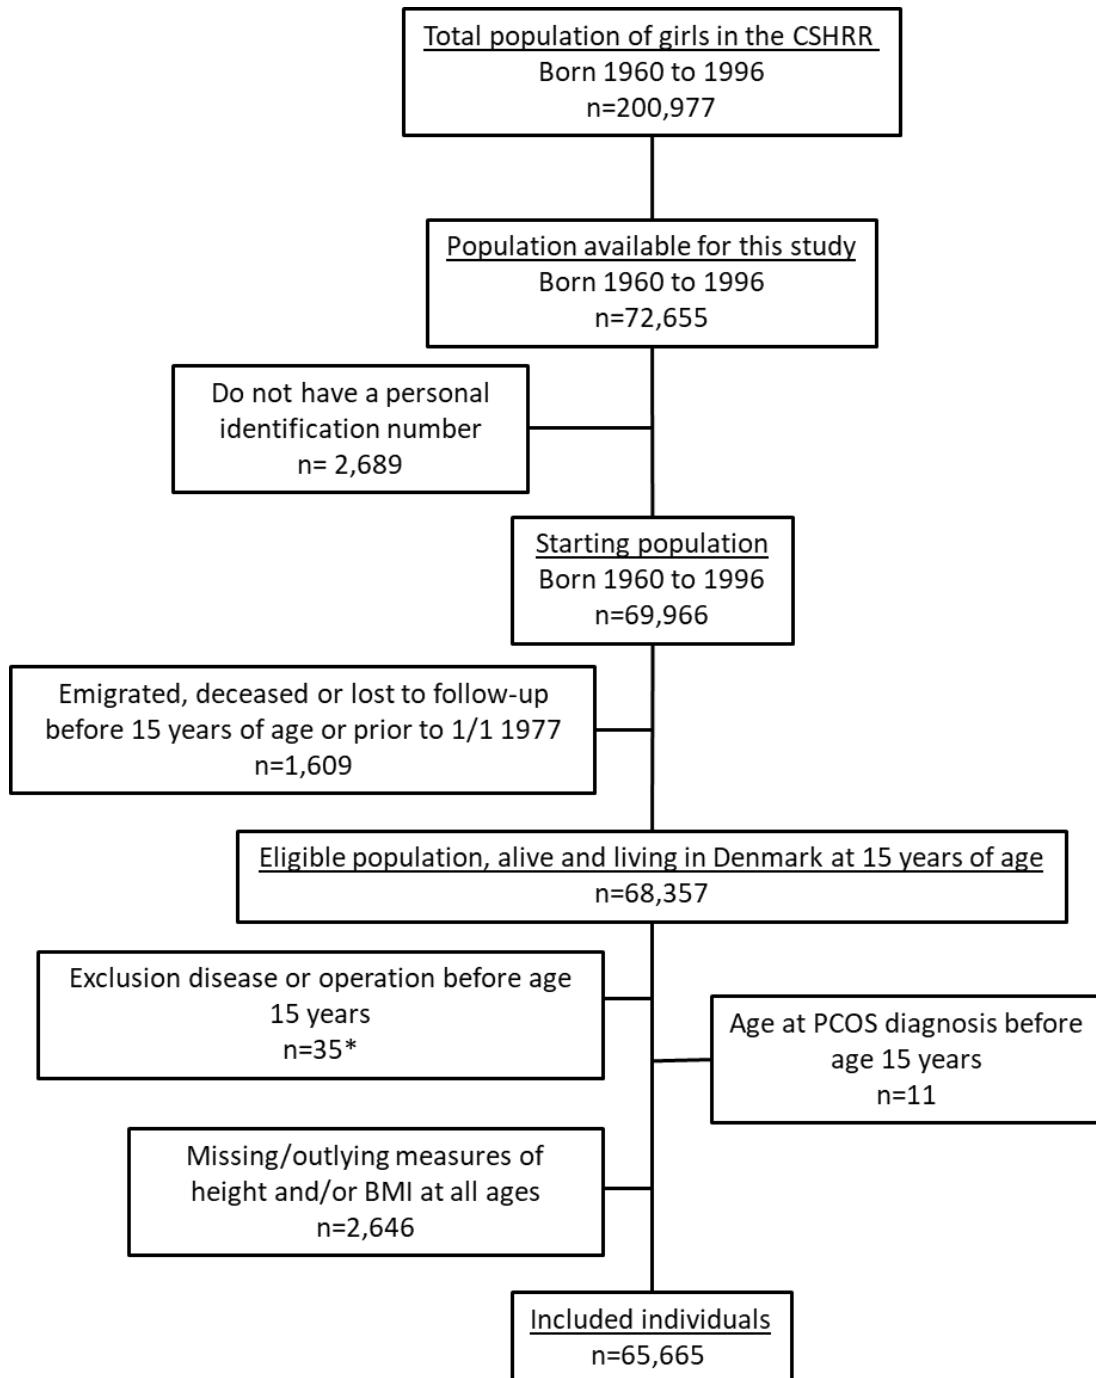

\*Turner syndrome (n=22) and adrenogenital syndrome (n=7). Further, exclusions were made for other diseases (acromegaly, Cushing’s disease, hyperprolactinemia) and operation (bilateral oophorectomy), which affected less than 5 individuals each.

**Supplementary Table S1.** Associations between childhood body mass index (BMI; kg/m<sup>2</sup>) at each age from 7 to 13 years and risks of polycystic ovary syndrome. The associations were modelled using linear splines with a knot at a z-score of 0\*

| Age (years) | BMI z-score |           |       |           |
|-------------|-------------|-----------|-------|-----------|
|             | z < 0       |           | z ≥ 0 |           |
|             | HR          | 95% CI    | HR    | 95% CI    |
| 7           | 1.01        | 0.83–1.23 | 1.73  | 1.57–1.91 |
| 8           | 0.98        | 0.80–1.19 | 1.76  | 1.59–1.95 |
| 9           | 1.02        | 0.82–1.29 | 1.87  | 1.67–2.10 |
| 10          | 1.08        | 0.84–1.39 | 1.86  | 1.64–2.11 |
| 11          | 0.98        | 0.76–1.27 | 1.97  | 1.73–2.25 |
| 12          | 0.94        | 0.72–1.23 | 2.15  | 1.89–2.44 |
| 13          | 1.07        | 0.80–1.44 | 1.91  | 1.68–2.18 |

HR, hazard ratio; CI, confidence interval.

\*Stratified by birth cohort.

**Supplementary Table S2.** Associations between different patterns of change in weight status from age 7 to 13 years and risks of polycystic ovary syndrome using girls with non-overweight at both ages as the reference\*

| <b>Weight status<sup>†</sup></b>                  | <b>n</b> | <b>Cases</b> | <b>HR</b>   | <b>95% CI</b> |
|---------------------------------------------------|----------|--------------|-------------|---------------|
| Non-overweight at 7 and 13 years                  | 32,175   | 177          | 1.00 (ref.) |               |
| Non-overweight at 7 years, overweight at 13 years | 2063     | 34           | 2.48        | 1.71-3.59     |
| Overweight at 7 years, non-overweight at 13 years | 1539     | 19           | 2.06        | 1.28-3.30     |
| Overweight at 7 and 13 years                      | 2508     | 65           | 3.91        | 2.93-5.21     |

HR, hazard ratio, CI, confidence interval.

\* Stratified by birth cohort.

<sup>†</sup> Overweight defined using the International Obesity Task Force criteria.
